# Supplementary material for: TMPO-AS1 promotes cell proliferation of thyroid cancer via sponging miR-498 to modulate TMPO
Source: PubMed Central journal article supplement (PMC7346673; doi:10.1186/s12935-020-01334-4), 2020-07-08
Supplement: 12935_2020_1334_MOESM4_ESM.pdf [file 12935_2020_1334_MOESM4_ESM.pdf]

# Cell Line Authentication Service

---

## STR Profiling Report

**Sample From:** the First Affiliated Hospital of  
Zhengzhou University

**Sample Type:** Cell Line

**Testing Method:** STR Genotyping

**Report Time:** 3/30/2020

## COMPANY STATEMENT

1. THIS REPORT IS ONLY RESPONSIBLE FOR THE SAMPLES ANALYZED.
2. THE TESTING RESULTS AND THE ORGANIZATION NAME WILL NOT BE USED FOR ADVERTISEMENT, COMMERCIAL EXHIBITIONS, COMMERCIAL PERFORMANCE AND OTHER COMMERCIAL ACTIVITIES.
3. OBJECTIONS SHOULD BE RAISED WITHIN FIFTEEN DAYS AFTER THE RECEIPT OF THIS REPORT.
4. THE PAPER REPORT WITH CONTENT ALTERING, ADDING OR WITHOUT THE STAMPED SEAL OF THE COMPANY ARE INVALID.

**Testing Company:** Shanghai Chenying Biotechnology Co. Ltd

**Address:** Room 502, NO.2 Zhongxing Creative Park, Lane 1015, LongtengRoad, Songjiang District, Shanghai

**Tel:** +86-021-33559493

**Contact:** Wenyao Zhang

**E-mail:** market@biowing.com

## Cell Line Authentication – STR Profiling Report

### Sample code

Table 1. Sample Code

| Customer's code | Company Code |
|-----------------|--------------|
| IHH-4           | 20200324-04  |

**Sample Number:** 1

**Sample Type:** Cell line

**Testing Type:** STR

**Testing Method:**

DNA was extracted by a commercial kit from CORNING (AP-EMN-BL-GDNA-250G). The twenty STRs including Amelogenin locus were amplified by six multiplex PCR and separated on ABI 3730XL Genetic Analyzer. The signals were then analyzed by the software GeneMapper.

**Data Interpretation:**

Cell lines were authenticated using Short Tandem Repeat (STR) analysis as described in 2012 in ANSI Standard (ASN-0002) by the ATCC Standards Development Organization (SDO) and in Capes-Davis et al., Match criteria for human cell line authentication: Where do we draw the line? *Int J Cancer*.2013;132(11):2510-9.

# Test Results

## 1. STR profile

Table 2. STR and Amelogenin Genotyping Results of Cell line.

| Loci    | Sample information |         |         | Cell Bank information |         |         |
|---------|--------------------|---------|---------|-----------------------|---------|---------|
|         | Sample name: IHH-4 |         |         | Cell line name: IHH-4 |         |         |
|         | Allele1            | Allele2 | Allele3 | Allele1               | Allele2 | Allele3 |
| D5S818  | 9                  | 13      |         | 9                     | 13      |         |
| D13S317 | 10                 | 13      |         | 10                    | 13      |         |
| D7S820  | 9                  | 10      |         | 9                     | 10      |         |
| D16S539 | 9                  | 11      |         | 9                     | 11      |         |
| VWA     | 16                 | 18      |         | 16                    | 18      |         |
| TH01    | 9                  | 9       |         | 9                     | 9       |         |
| AMEL    | X                  | Y       |         | X                     | Y       |         |
| TPOX    | 11                 | 11      |         | 11                    | 11      |         |
| CSF1PO  | 12                 | 12      |         | 12                    | 12      |         |
| FGA     | 23                 | 24      |         |                       |         |         |
| D21S11  | 30                 | 31      |         |                       |         |         |
| D18S51  | 13                 | 15      |         |                       |         |         |
| D8S1179 | 11                 | 15      |         |                       |         |         |
| D3S1358 | 16                 | 16      |         |                       |         |         |

## 2. database annotation

Figure 1. STR matching analysis

| Cell line name                     | IHH-4                                                                                                                                                                                                                                                                                                                                                                                                                                                                                                                                                                                                                                                                                                   |            |          |         |      |                 |    |                   |       |                   |       |             |       |                 |       |                 |      |        |       |        |       |     |       |      |   |      |    |     |       |
|------------------------------------|---------------------------------------------------------------------------------------------------------------------------------------------------------------------------------------------------------------------------------------------------------------------------------------------------------------------------------------------------------------------------------------------------------------------------------------------------------------------------------------------------------------------------------------------------------------------------------------------------------------------------------------------------------------------------------------------------------|------------|----------|---------|------|-----------------|----|-------------------|-------|-------------------|-------|-------------|-------|-----------------|-------|-----------------|------|--------|-------|--------|-------|-----|-------|------|---|------|----|-----|-------|
| Synonyms                           | IHH4                                                                                                                                                                                                                                                                                                                                                                                                                                                                                                                                                                                                                                                                                                    |            |          |         |      |                 |    |                   |       |                   |       |             |       |                 |       |                 |      |        |       |        |       |     |       |      |   |      |    |     |       |
| Accession                          | CVCL_2960                                                                                                                                                                                                                                                                                                                                                                                                                                                                                                                                                                                                                                                                                               |            |          |         |      |                 |    |                   |       |                   |       |             |       |                 |       |                 |      |        |       |        |       |     |       |      |   |      |    |     |       |
| Resource Identification Initiative | To cite this cell line use: IHH-4 (RRID:CVCL_2960)                                                                                                                                                                                                                                                                                                                                                                                                                                                                                                                                                                                                                                                      |            |          |         |      |                 |    |                   |       |                   |       |             |       |                 |       |                 |      |        |       |        |       |     |       |      |   |      |    |     |       |
| Comments                           | Part of: Cancer Cell Line Encyclopedia (CCLE) project.<br>Part of: COSMIC cell lines project.<br>Doubling time: 42 hours (PubMed=11686581).<br>Microsatellite instability: Stable (MSS) (Sanger).<br>Omics: Deep exome analysis.<br>Omics: DNA methylation analysis.<br>Omics: SNP array analysis.<br>Omics: Transcriptome analysis.                                                                                                                                                                                                                                                                                                                                                                    |            |          |         |      |                 |    |                   |       |                   |       |             |       |                 |       |                 |      |        |       |        |       |     |       |      |   |      |    |     |       |
| Sequence variations                | AKT1 p.Glu17Lys (c.49G>A) (PubMed=23833040; PubMed=30737244).<br>BRAF p.Val600Glu (c.1799T>A) (PubMed=23833040; PubMed=30737244).<br>CREBBP p.Trp592Ter (c.1776G>A) (PubMed=30737244).<br>CRLF2 p.Trp255Ter (c.765G>A) (PubMed=30737244).<br>EP300 p.Arg1312Ter (c.3934C>T) (PubMed=30737244).<br>RAC1 p.Asp11Glu (c.33C>G) (PubMed=30737244).<br>Heterozygous for TERT c.228C>T (-124C>T); in promoter (PubMed=23833040; PubMed=30737244).                                                                                                                                                                                                                                                             |            |          |         |      |                 |    |                   |       |                   |       |             |       |                 |       |                 |      |        |       |        |       |     |       |      |   |      |    |     |       |
| Genome ancestry                    | Source: PubMed=30894373<br><table border="1"> <thead> <tr> <th>Origin</th> <th>% genome</th> </tr> </thead> <tbody> <tr> <td>African</td> <td>1.71</td> </tr> <tr> <td>Native American</td> <td>0</td> </tr> <tr> <td>East Asian, North</td> <td>73.08</td> </tr> <tr> <td>East Asian, South</td> <td>21.44</td> </tr> <tr> <td>South Asian</td> <td>0</td> </tr> <tr> <td>European, North</td> <td>0.89</td> </tr> <tr> <td>European, South</td> <td>2.88</td> </tr> </tbody> </table>                                                                                                                                                                                                                 | Origin     | % genome | African | 1.71 | Native American | 0  | East Asian, North | 73.08 | East Asian, South | 21.44 | South Asian | 0     | European, North | 0.89  | European, South | 2.88 |        |       |        |       |     |       |      |   |      |    |     |       |
| Origin                             | % genome                                                                                                                                                                                                                                                                                                                                                                                                                                                                                                                                                                                                                                                                                                |            |          |         |      |                 |    |                   |       |                   |       |             |       |                 |       |                 |      |        |       |        |       |     |       |      |   |      |    |     |       |
| African                            | 1.71                                                                                                                                                                                                                                                                                                                                                                                                                                                                                                                                                                                                                                                                                                    |            |          |         |      |                 |    |                   |       |                   |       |             |       |                 |       |                 |      |        |       |        |       |     |       |      |   |      |    |     |       |
| Native American                    | 0                                                                                                                                                                                                                                                                                                                                                                                                                                                                                                                                                                                                                                                                                                       |            |          |         |      |                 |    |                   |       |                   |       |             |       |                 |       |                 |      |        |       |        |       |     |       |      |   |      |    |     |       |
| East Asian, North                  | 73.08                                                                                                                                                                                                                                                                                                                                                                                                                                                                                                                                                                                                                                                                                                   |            |          |         |      |                 |    |                   |       |                   |       |             |       |                 |       |                 |      |        |       |        |       |     |       |      |   |      |    |     |       |
| East Asian, South                  | 21.44                                                                                                                                                                                                                                                                                                                                                                                                                                                                                                                                                                                                                                                                                                   |            |          |         |      |                 |    |                   |       |                   |       |             |       |                 |       |                 |      |        |       |        |       |     |       |      |   |      |    |     |       |
| South Asian                        | 0                                                                                                                                                                                                                                                                                                                                                                                                                                                                                                                                                                                                                                                                                                       |            |          |         |      |                 |    |                   |       |                   |       |             |       |                 |       |                 |      |        |       |        |       |     |       |      |   |      |    |     |       |
| European, North                    | 0.89                                                                                                                                                                                                                                                                                                                                                                                                                                                                                                                                                                                                                                                                                                    |            |          |         |      |                 |    |                   |       |                   |       |             |       |                 |       |                 |      |        |       |        |       |     |       |      |   |      |    |     |       |
| European, South                    | 2.88                                                                                                                                                                                                                                                                                                                                                                                                                                                                                                                                                                                                                                                                                                    |            |          |         |      |                 |    |                   |       |                   |       |             |       |                 |       |                 |      |        |       |        |       |     |       |      |   |      |    |     |       |
| Disease                            | Thyroid gland papillary carcinoma (NCIt: C4035)<br>Differentiated thyroid carcinoma (ORDO: Orphanet_146)<br>Derived from metastatic site: Left cervical lymph node.                                                                                                                                                                                                                                                                                                                                                                                                                                                                                                                                     |            |          |         |      |                 |    |                   |       |                   |       |             |       |                 |       |                 |      |        |       |        |       |     |       |      |   |      |    |     |       |
| Species of origin                  | Homo sapiens (Human) (NCBI Taxonomy: 9606)                                                                                                                                                                                                                                                                                                                                                                                                                                                                                                                                                                                                                                                              |            |          |         |      |                 |    |                   |       |                   |       |             |       |                 |       |                 |      |        |       |        |       |     |       |      |   |      |    |     |       |
| Hierarchy                          | Children:<br>CVCL_3219 (TMH-1)                                                                                                                                                                                                                                                                                                                                                                                                                                                                                                                                                                                                                                                                          |            |          |         |      |                 |    |                   |       |                   |       |             |       |                 |       |                 |      |        |       |        |       |     |       |      |   |      |    |     |       |
| Sex of cell                        | Male                                                                                                                                                                                                                                                                                                                                                                                                                                                                                                                                                                                                                                                                                                    |            |          |         |      |                 |    |                   |       |                   |       |             |       |                 |       |                 |      |        |       |        |       |     |       |      |   |      |    |     |       |
| Age at sampling                    | 75Y                                                                                                                                                                                                                                                                                                                                                                                                                                                                                                                                                                                                                                                                                                     |            |          |         |      |                 |    |                   |       |                   |       |             |       |                 |       |                 |      |        |       |        |       |     |       |      |   |      |    |     |       |
| Category                           | Cancer cell line                                                                                                                                                                                                                                                                                                                                                                                                                                                                                                                                                                                                                                                                                        |            |          |         |      |                 |    |                   |       |                   |       |             |       |                 |       |                 |      |        |       |        |       |     |       |      |   |      |    |     |       |
| STR profile                        | Source(s): Cosmic-CLP; JCRB; PubMed=30737244<br><b>Markers:</b><br><table border="1"> <tbody> <tr> <td>Amelogenin</td> <td>X,Y</td> </tr> <tr> <td>CSF1PO</td> <td>12</td> </tr> <tr> <td>D3S1358</td> <td>16</td> </tr> <tr> <td>D5S818</td> <td>9,13</td> </tr> <tr> <td>D7S820</td> <td>9,10</td> </tr> <tr> <td>D8S1179</td> <td>11,15</td> </tr> <tr> <td>D13S317</td> <td>10,13</td> </tr> <tr> <td>D16S539</td> <td>9,11</td> </tr> <tr> <td>D18S51</td> <td>13,15</td> </tr> <tr> <td>D21S11</td> <td>30,31</td> </tr> <tr> <td>FGA</td> <td>23,24</td> </tr> <tr> <td>TH01</td> <td>9</td> </tr> <tr> <td>TPOX</td> <td>11</td> </tr> <tr> <td>YWA</td> <td>16,18</td> </tr> </tbody> </table> | Amelogenin | X,Y      | CSF1PO  | 12   | D3S1358         | 16 | D5S818            | 9,13  | D7S820            | 9,10  | D8S1179     | 11,15 | D13S317         | 10,13 | D16S539         | 9,11 | D18S51 | 13,15 | D21S11 | 30,31 | FGA | 23,24 | TH01 | 9 | TPOX | 11 | YWA | 16,18 |
| Amelogenin                         | X,Y                                                                                                                                                                                                                                                                                                                                                                                                                                                                                                                                                                                                                                                                                                     |            |          |         |      |                 |    |                   |       |                   |       |             |       |                 |       |                 |      |        |       |        |       |     |       |      |   |      |    |     |       |
| CSF1PO                             | 12                                                                                                                                                                                                                                                                                                                                                                                                                                                                                                                                                                                                                                                                                                      |            |          |         |      |                 |    |                   |       |                   |       |             |       |                 |       |                 |      |        |       |        |       |     |       |      |   |      |    |     |       |
| D3S1358                            | 16                                                                                                                                                                                                                                                                                                                                                                                                                                                                                                                                                                                                                                                                                                      |            |          |         |      |                 |    |                   |       |                   |       |             |       |                 |       |                 |      |        |       |        |       |     |       |      |   |      |    |     |       |
| D5S818                             | 9,13                                                                                                                                                                                                                                                                                                                                                                                                                                                                                                                                                                                                                                                                                                    |            |          |         |      |                 |    |                   |       |                   |       |             |       |                 |       |                 |      |        |       |        |       |     |       |      |   |      |    |     |       |
| D7S820                             | 9,10                                                                                                                                                                                                                                                                                                                                                                                                                                                                                                                                                                                                                                                                                                    |            |          |         |      |                 |    |                   |       |                   |       |             |       |                 |       |                 |      |        |       |        |       |     |       |      |   |      |    |     |       |
| D8S1179                            | 11,15                                                                                                                                                                                                                                                                                                                                                                                                                                                                                                                                                                                                                                                                                                   |            |          |         |      |                 |    |                   |       |                   |       |             |       |                 |       |                 |      |        |       |        |       |     |       |      |   |      |    |     |       |
| D13S317                            | 10,13                                                                                                                                                                                                                                                                                                                                                                                                                                                                                                                                                                                                                                                                                                   |            |          |         |      |                 |    |                   |       |                   |       |             |       |                 |       |                 |      |        |       |        |       |     |       |      |   |      |    |     |       |
| D16S539                            | 9,11                                                                                                                                                                                                                                                                                                                                                                                                                                                                                                                                                                                                                                                                                                    |            |          |         |      |                 |    |                   |       |                   |       |             |       |                 |       |                 |      |        |       |        |       |     |       |      |   |      |    |     |       |
| D18S51                             | 13,15                                                                                                                                                                                                                                                                                                                                                                                                                                                                                                                                                                                                                                                                                                   |            |          |         |      |                 |    |                   |       |                   |       |             |       |                 |       |                 |      |        |       |        |       |     |       |      |   |      |    |     |       |
| D21S11                             | 30,31                                                                                                                                                                                                                                                                                                                                                                                                                                                                                                                                                                                                                                                                                                   |            |          |         |      |                 |    |                   |       |                   |       |             |       |                 |       |                 |      |        |       |        |       |     |       |      |   |      |    |     |       |
| FGA                                | 23,24                                                                                                                                                                                                                                                                                                                                                                                                                                                                                                                                                                                                                                                                                                   |            |          |         |      |                 |    |                   |       |                   |       |             |       |                 |       |                 |      |        |       |        |       |     |       |      |   |      |    |     |       |
| TH01                               | 9                                                                                                                                                                                                                                                                                                                                                                                                                                                                                                                                                                                                                                                                                                       |            |          |         |      |                 |    |                   |       |                   |       |             |       |                 |       |                 |      |        |       |        |       |     |       |      |   |      |    |     |       |
| TPOX                               | 11                                                                                                                                                                                                                                                                                                                                                                                                                                                                                                                                                                                                                                                                                                      |            |          |         |      |                 |    |                   |       |                   |       |             |       |                 |       |                 |      |        |       |        |       |     |       |      |   |      |    |     |       |
| YWA                                | 16,18                                                                                                                                                                                                                                                                                                                                                                                                                                                                                                                                                                                                                                                                                                   |            |          |         |      |                 |    |                   |       |                   |       |             |       |                 |       |                 |      |        |       |        |       |     |       |      |   |      |    |     |       |

**Note:** The STR online match analysis of the test cell against EXPASY database, showing cell number (Cell No.) and cell name.

## 3. Authentication

The submitted sample profile is human, but not a match for any profile in the DSMZ STR database.

The submitted profile is an exact match for the following human cell line(s) in the EXPASY STR database (8 core loci plus Amelogenin): **IHH-4**.

The submitted profile is similar to the following DSMZ human cell line: /.

- **Note:** A cell line can be considered to be authenticated when 80% (exact match) of the alleles in its STR profile match profiles from tissue or other cell line samples from that donor or from database. Cell lines with between a 55% to 80% (similar) match require further profiling for investigation of relatedness.

# Appendix:

## 1. Genotyping Strategy and Site Distribution

Table S1. Experimental Strategy and Sites

|   | Strategy 1 | Strategy 2 | Strategy 3 | Strategy 4 |
|---|------------|------------|------------|------------|
| 1 | D3S1358    | D8S1179    | D19S433    | AMEL       |
| 2 | VWA        | D21S11     | TH01       | D1S1656    |
| 3 | D7S820     | D16S539    | D13S317    | D5S818     |
| 4 | CSF1PO     | D2S1338    | TPOX       | D12S391    |
| 5 | PENTAE     | PENTAD     | D18S51     | FGA        |
| 6 | D6S1043    |            |            |            |

*The allele match algorithm compares the 8 core loci plus amelogenin only, even though alleles from all loci will be reported when available.*

2. DSMZ tools was used to carry on the cell line comparison, which contains 2455 cell lines STR data from ATCC, DSMZ, JCRB ,ECACC, GNE and RIKEN databases. If the cell is not included in the above cell library, users need to compared with other databases.

**Technician:** Jianan Zhang

**Checked by:** Ning Qian

**Issued by:** Yang Bai

**Issue date:** 3/30/2020
